# Supplementary material
Source: Research Square preprint supplement (doi:10.21203/rs.3.rs-10207522/v1)
Supplement: Supplementary file 1 [file 3b2635df035909524ca69b4a.xlsx]

## Sheet: plan1
Supplementary table 1 Meteorological conditions of test locations of the experimental environments across the 2019/2020 and 2020/2021 growing seasons
Code	Growing seasons	Location (Farm)	Month	Rainfall (mm)	High temperature (ºC)	Low temperature (ºC)	Average temperature (ºC)	Average Relative humidity (%)
E1	2020/2021	Abadia	October	167.5	28.5065	20.4774	24.4919	72.6774
			November	157	29.36	21.03	25.195	73.6
			December	30	31.7129	21.5935	26.6532	68.7258
			January	15	34.8065	22.7032	28.7548	64.0484
			February	304.5	34.8107	23.0143	28.9125	64.875
			March	100	32.7742	22.7645	27.7694	69.4355
			Total	774	31.9632	21.9176	26.9404	68.9341
E2	2020/2021	Ayrizes	October	110	29.229	20.7065	24.9677	72.7742
			November	136	29.16	20.7467	24.9533	74.0833
			December	75	31.8129	21.9613	26.8871	72.0161
			January	20	32.9645	22.0613	27.5129	66.6774
			February	263	31.6214	21.8393	26.7304	72.0179
			March	95	33.0194	21.8161	27.4177	69.6452
			Total	699	31.3077	21.5209	26.4143	71.1731
E3	2020/2021	Guandu	October	245	29.7194	20.6613	25.1903	69.5968
			November	178	29.2067	21.29	25.2483	73.35
			December	171	30.4935	22.0097	26.2516	72.9355
			January	42	31.9484	22.6194	27.2839	72.0161
			February	225	31.3893	22.7607	27.075	73.0714
			March	115	29.9774	21.2355	25.6065	72.7742
			Total	976	30.4473	21.7489	26.0981	72.272
E4	2019/2020	Primus	October	54	28.9774	20.7452	24.8613	74.8387
			November	354	28.2733	20.7467	24.51	78.6667
			December	315	29.6065	21.771	25.6887	78.5323
			January	225	30.9581	22.1484	26.5532	77.3387
			February	257	29.8207	22.7138	26.2672	78.9655
			March	229	28.88	20.9	24.89	78.5833
			Total	1434	29.4242	21.4984	25.4613	77.7995
E5	2020/2021	Primus	October	149	28.6226	20.6	24.6113	59.9839
			November	307	28.24	20.4767	24.3583	63.7
			December	240	30.7226	22.1129	26.4177	62.5484
			January	100	32.5742	22.2226	27.3984	49.2581
			February	296	30.975	21.7286	26.3518	59.2321
			March	111	31.971	21.6677	26.8194	54.871
			Total	1203	30.5225	21.4692	25.9959	58.2198
