# Supplementary material
Source: Research Square preprint supplement (doi:10.21203/rs.3.rs-10207522/v1)
Supplement: Supplementary file 2 [file 40c85b85f8994f643f41c21f.xlsx]

## Sheet: Sheet1
Supplementary table 2 Soil properties of test locations of the experimental environments across the 2019/2020 and 2020/2021 growing seasons
Code	Growing seasons	Location (Farm)	Property	Unit	Content
E1	2020/2021	Abadia	Sand	g kg-1	102
			Silt	g kg-1	518
			Clay	g kg-1	380
			pHwater	Units	5.5
			C	%	1.99
			OM	%	3.43
			P	mg dm-3	4
			K	cmolc dm-3	0.26
			Ca	cmolc dm-3	4.3
			Mg	cmolc dm-3	3.3
			H + Al	cmolc dm-3	4.6
			Na	cmolc dm-3	0.23
			Al	cmolc dm-3	0.1
			CEC	cmolc dm-3	12.7
			CEC pH 7.0	cmolc dm-3	8.2
			BS pH 7.0	%	63.7
			SB	%	8.10
E2	2020/2021	Ayrizes	Sand	g kg-1	189
			Silt	g kg-1	461
			Clay	g kg-1	350
			pHwater	Units	5.1
			C	%	1.69
			OM	%	2.91
			P	mg dm-3	5
			K	cmolc dm-3	0.25
			Ca	cmolc dm-3	3.7
			Mg	cmolc dm-3	2.5
			H + Al	cmolc dm-3	4.32
			Na	cmolc dm-3	0.13
			Al	cmolc dm-3	0.21
			CEC	cmolc dm-3	10.9
			CEC pH 7.0	cmolc dm-3	6.8
			BS pH 7.0	%	60.4
			SB	%	6.6
E3	2020/2021	Guandu	Sand	g kg-1	705
			Silt	g kg-1	43
			Clay	g kg-1	252
			pHwater	Units	5.3
			C	%	0.8
			OM	%	1.4
			P	mg dm-3	6.0
			K	cmolc dm-3	0.06
			Ca	cmolc dm-3	1.2
			Mg	cmolc dm-3	0.6
			H + Al	cmolc dm-3	3.0
			Na	cmolc dm-3	0.02
			Al	cmolc dm-3	0.2
			CEC	cmolc dm-3	4.9
			CEC pH 7.0	cmolc dm-3	2.1
			BS pH 7.0	%	38.3
			SB	%	1.9
E4	2019/2020	Primus	Sand	g kg-1	1.84
			Silt	g kg-1	3.17
			Clay	g kg-1	4.9
			pHwater	Units	510
			C	%	350
			OM	%	140
			P	mg dm-3	38
			K	cmolc dm-3	0.26
			Ca	cmolc dm-3	2.6
			Mg	cmolc dm-3	1.5
			H + Al	cmolc dm-3	6.0
			Na	cmolc dm-3	0.08
			Al	cmolc dm-3	1.4
			CEC	cmolc dm-3	10.4
			CEC pH 7.0	cmolc dm-3	5.8
			BS pH 7.0	%	42.5
			SB	%	4.4
E5	2020/2021	Primus	Sand	g kg-1	441
			Silt	g kg-1	366
			Clay	g kg-1	193
			pHwater	Units	5.3
			C	%	1.81
			OM	%	3.11
			P	mg dm-3	58
			K	cmolc dm-3	0.44
			Ca	cmolc dm-3	5.9
			Mg	cmolc dm-3	3.7
			H + Al	cmolc dm-3	3.9
			Na	cmolc dm-3	0.2
			Al	cmolc dm-3	0.1
			CEC	cmolc dm-3	14.1
			CEC pH 7.0	cmolc dm-3	10.3
			BS pH 7.0	%	73
			SB	%	10.2
OM - organic matter; CEC - cation-exchange capacity; BS - base saturation; SB - sum of bases.
